# Supplementary material for: A robust targeted sequencing approach for low input and variable quality DNA from clinical samples
Source: PubMed Central journal article supplement (PMC5768874; doi:10.1038/s41525-017-0041-4), 2018-01-15
Supplement: 41525_2017_41_MOESM1_ESM.pdf [file 41525_2017_41_MOESM1_ESM.pdf]

## **SUPPLEMENTARY MATERIALS**

### **A Robust Targeted Sequencing Approach for Low Input and Variable Quality DNA from Clinical Samples**

Austin P. So<sup>1,\*</sup>, Anna Vilborg<sup>1,\*§</sup>, Yosr Bouhlal<sup>1</sup>, Ryan T. Koehler<sup>1</sup>, Susan M. Grimes<sup>2</sup>, Yannick Pouliot<sup>1</sup>, Daniel Mendoza<sup>1</sup>, Janet Ziegler<sup>1</sup>, Jason Stein<sup>1</sup>, Federico Goodsaid<sup>1</sup>, Michael Y. Lucero<sup>1</sup>, Francisco M. De La Vega<sup>1,3</sup>, Hanlee P. Ji.<sup>2,4,§</sup>

<sup>1</sup>TOMA Biosciences, Foster City, CA, USA

<sup>2</sup>Stanford Genome Technology Center, Palo Alto CA, USA

<sup>3</sup>Department of Biomedical Data Science, Stanford University School of Medicine, Stanford CA, 94305

<sup>4</sup>Division of Oncology, and Stanford University School of Medicine, Stanford CA, USA

\*These authors contributed equally to this work.

§Corresponding authors

#### **Correspondences:**

Anna Vilborg

Email: [anna@tomabio.com](mailto:anna@tomabio.com)

Hanlee P. Ji

Email: [genomics\\_ji@stanford.edu](mailto:genomics_ji@stanford.edu)

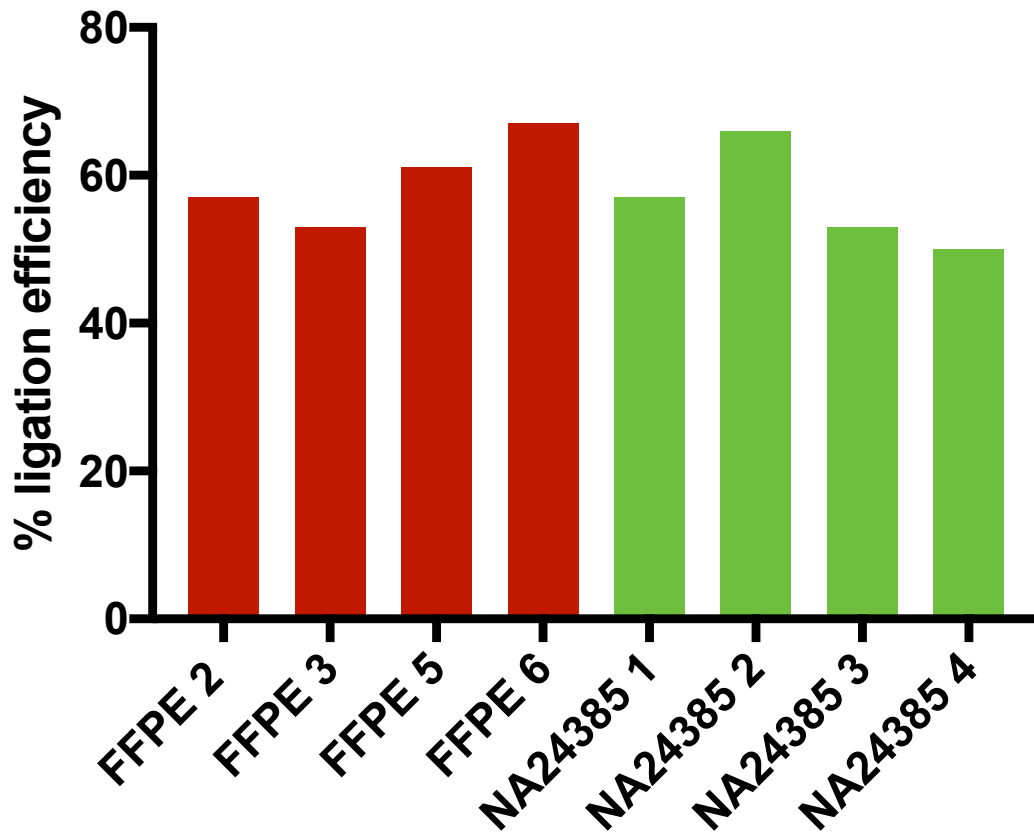

**Supplementary Figure 1. Ligation efficiency in FFPE and reference samples**

Four FFPE samples (FFPE 2, 3, 5 and 6 as listed in Supplementary table 2) and 4 NA24385 reference DNA samples were processed through the repair and kinasing steps of the TOMA 130-gene protocol and assayed for ligation efficiency by ddPCR (see Methods).

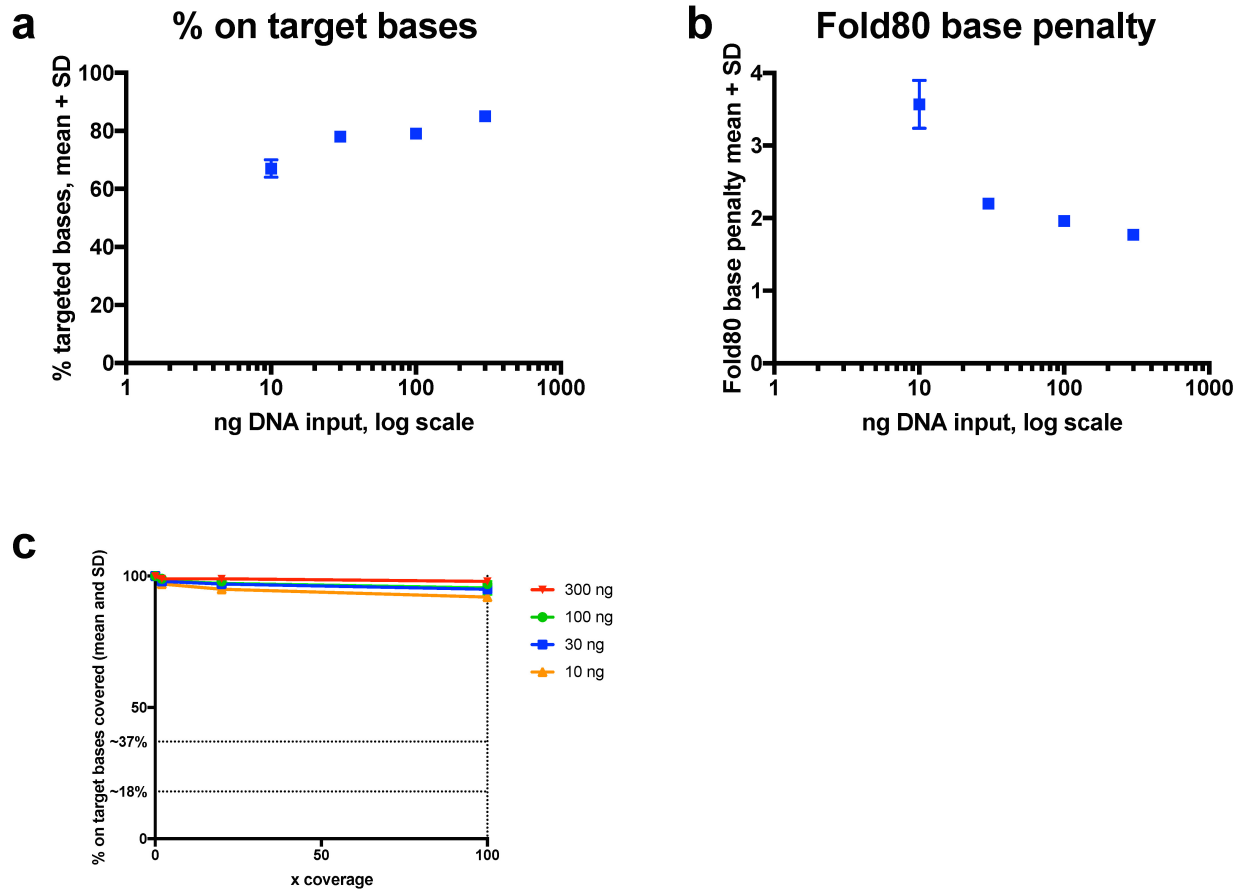

**Supplementary Figure 2. Metrics from NA12878 mass titration experiment.**

The percentage of the on-target bases (a) and the fold 80 base penalty (b) are shown as a function of DNA input. All data points show mean (squares) and **SD** (error bars), but the SD is too small to be visible for data points other than at 10 ng. (c) The percentage of targeted bases covered at 0X, 2X, 20X, and 100X as a function of DNA input (300 ng: red triangles, 100 ng: green circles, 30 ng: blue squares, 10 ng: yellow inverted triangles). All data points show mean (symbols) and SD (error bars) across four technical replicates, however the SD is smaller than the size of the symbol and therefore not visible). The dotted lines at ~18% and ~37% show the approximate range of % bases (lowest to highest) covered at 100X in whole exome sequencing of NA18943 using four separate whole exome protocols (Shigemizu et al, Science Reports 2015).

Shigemizu, D. et al. Performance comparison of four commercial human whole-exome capture platforms. Science Reports 5, 12742 (2015).

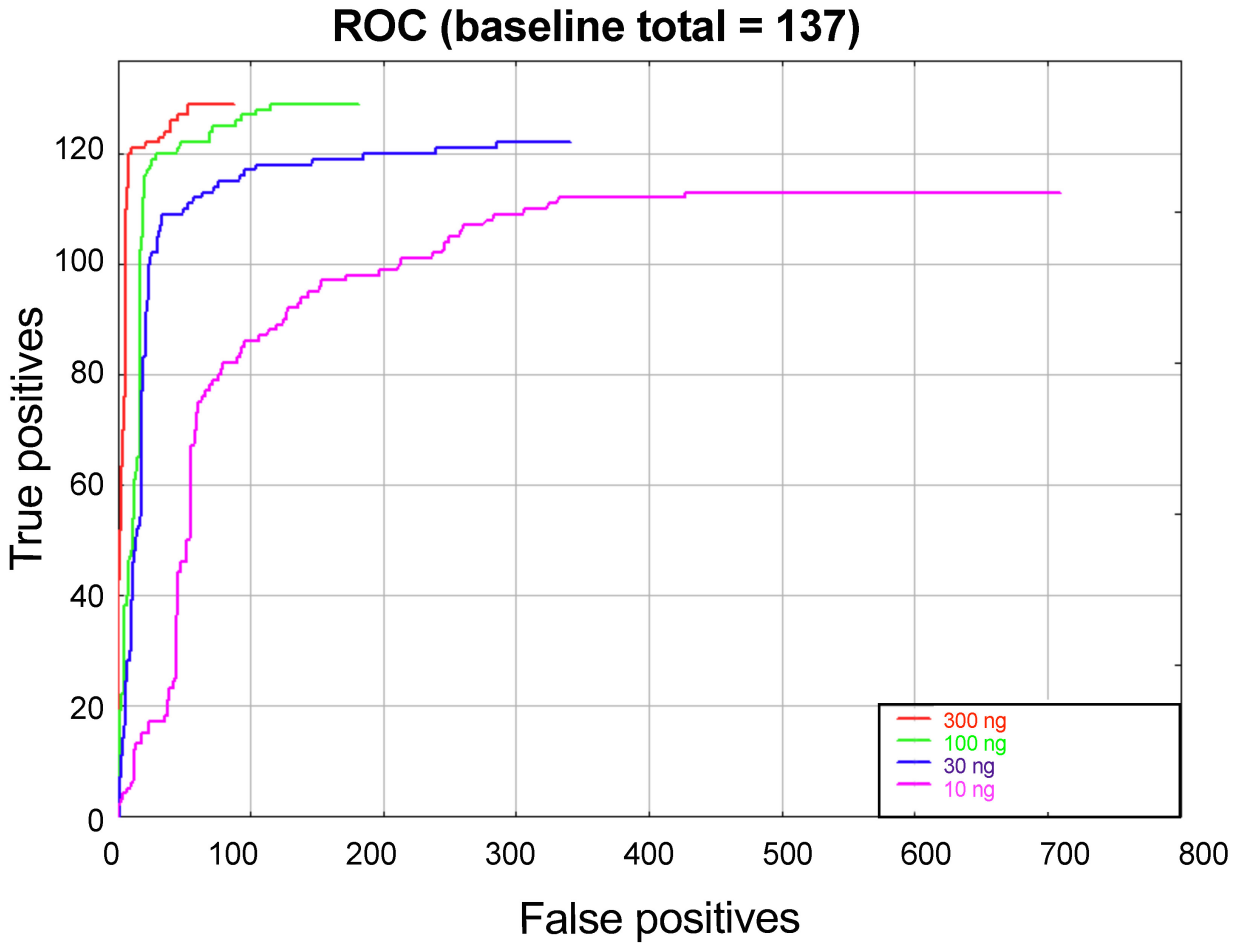

**Supplementary Figure 3. Performance curve for variant detection.**

A receiver-operator curve (**ROC**) showing true positives and false positives from one representative replicate of NA12878 at 300 (red line), 100 (green line), 30 (purple line), and 10 (pink line) ng input. The total variants included 128 single nucleotide variants (SNVs), and 9 insertions and deletions (indels).

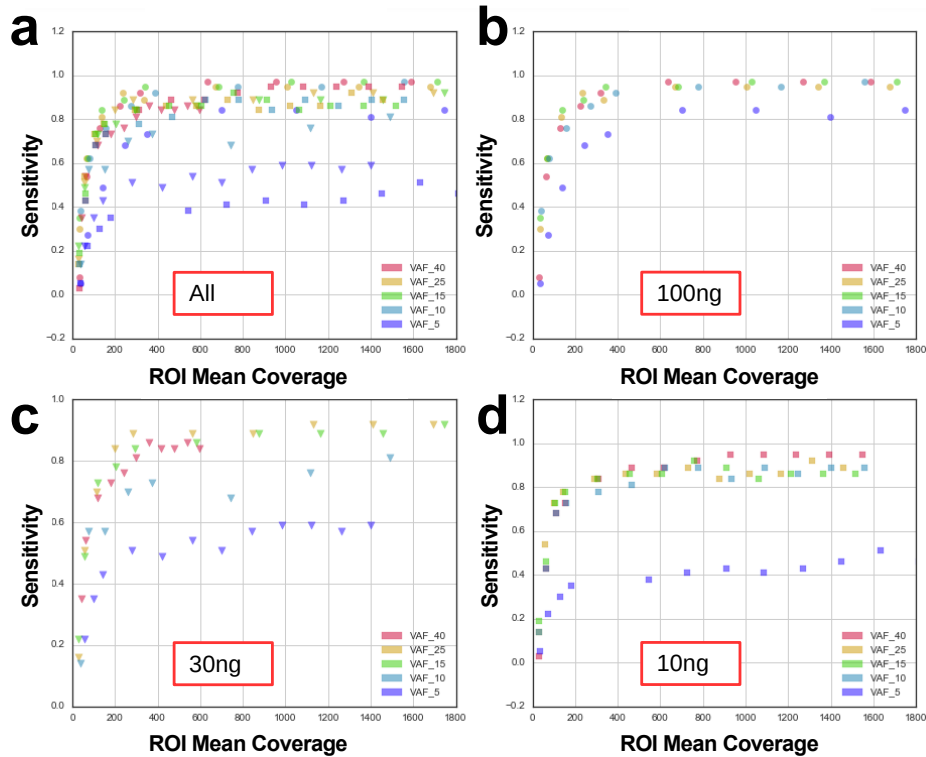

**Supplementary Figure 4. Subsampling of the STMM-Mix-II SNV reference experiment.**

To obtain a minimal threshold of mean coverage below which sensitivity is affected, we performed subsampling of the STMM-Mix-II SNV reference materials (Methods) and evaluated sensitivity at each subsampling threshold. We found that once mean coverage dropped below 200X, sensitivity was significantly affected. Pink: 40% VAF, orange: 25% VAF, Green: 15% VAF, light blue: 10% VAF, dark blue: 5% VAF, circles: 100 ng, triangles: 30 ng, squares: 10 ng. (a) depicts data from all input samples, (b) from 100 ng, (c) from 30 ng, and (d) from 10 ng.

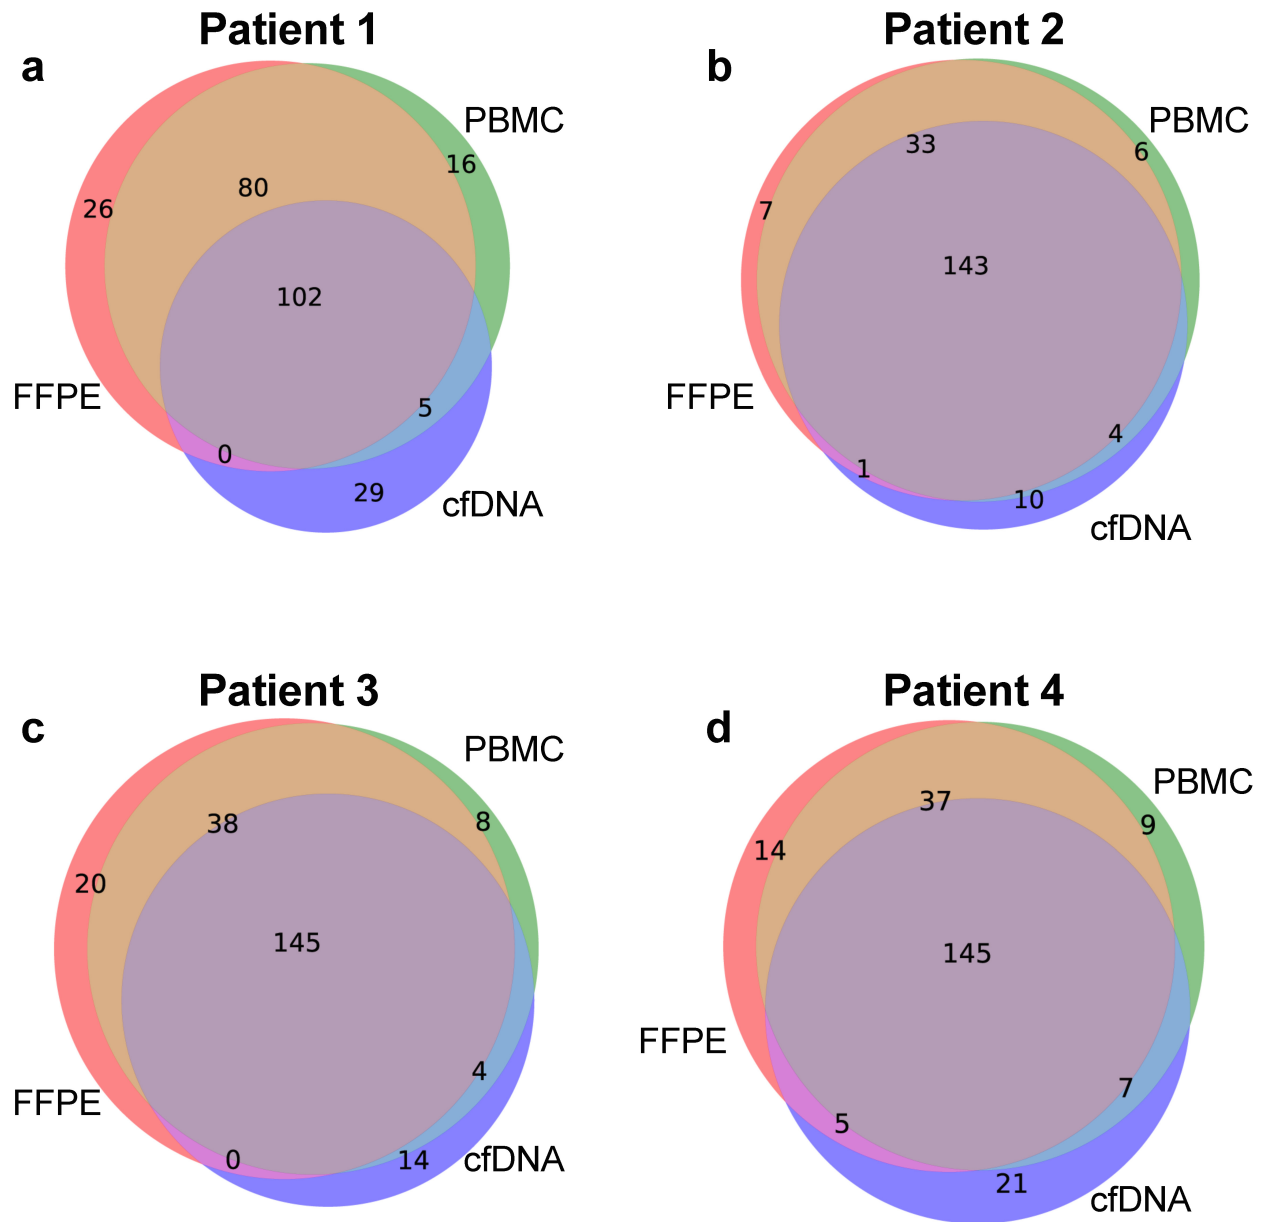

**Supplementary Figure 5. Variant overlap from matched clinical samples.**

Overlap of variants called by GATK in the FFPE (red circles), PBMC (green circles), and cfDNA (blue circles) samples from the four patients included in the matched sample study. (a-d) shows patient 1-4, respectively.

### a, FFPE 3

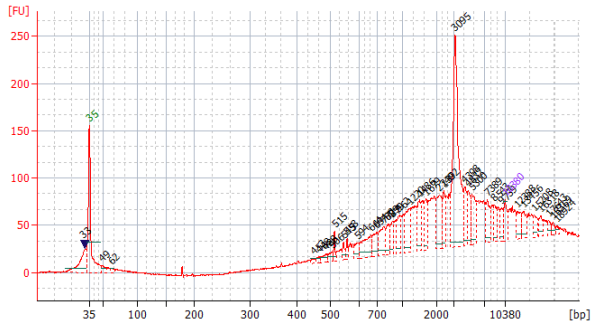

### b, FFPE 6

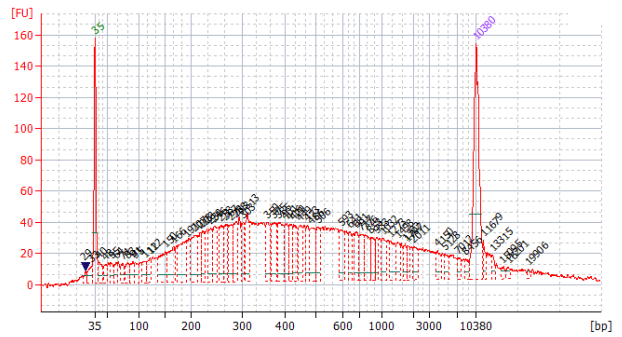

### c, HD200

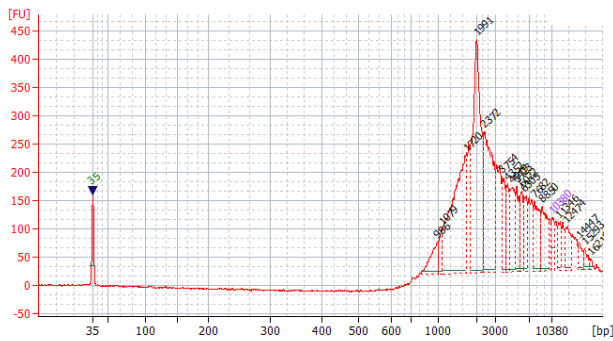

#### Supplementary Figure 6. DNA fragmentation in select FFPE derived DNA samples.

To investigate the level of DNA fragmentation in select FFPE samples at input (before sonication), two clinical FFPE samples (FFPE 3 (a) and 6 (b) as listed in Supplementary table 2) as well as the HD200 FFPE reference sample (c) were analyzed on the Bioanalyzer 2100. The figure shows that DNA fragmentation ranged from low in FFPE sample 3 and in HD200 to significant in FFPE sample 6 with an average fragment size of ~ 300 bp.

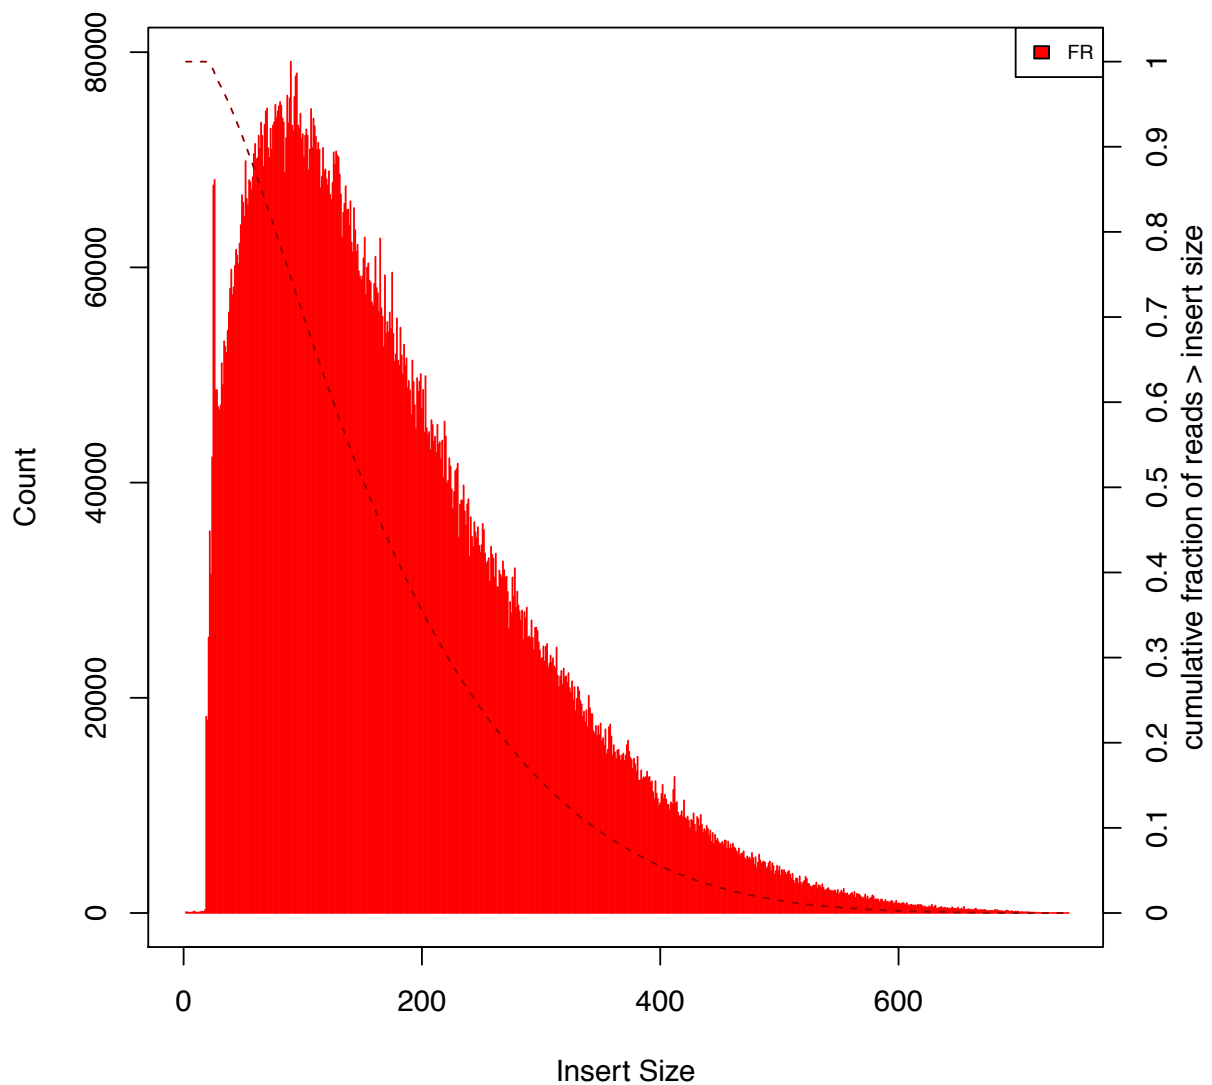

**Supplementary Figure 7. Insert size measured by sequencing in NA12878.**

The figure shows insert size measured by sequencing (detailed in the Methods section) for one sample of NA12878 at 100 ng. 3 additional replicates showed virtually identical patterns. Individual fragments shown in red and the dotted line shows the cumulative fraction of reads larger than insert size.



**Supplementary Table 1. 130-gene list.**

|              |               |               |              |               |               |                |               |
|--------------|---------------|---------------|--------------|---------------|---------------|----------------|---------------|
| <i>ABL1</i>  | <i>BRCA1</i>  | <i>CDKN2B</i> | <i>FGFR1</i> | <i>KIT</i>    | <i>NBN</i>    | <i>PTPN11</i>  | <i>SYK</i>    |
| <i>ABL2</i>  | <i>BRCA2</i>  | <i>CEBPA</i>  | <i>FGFR2</i> | <i>KRAS</i>   | <i>NF1</i>    | <i>RAD50</i>   | <i>TET2</i>   |
| <i>AKT1</i>  | <i>BTK</i>    | <i>CSF1R</i>  | <i>FGFR3</i> | <i>MAP2K1</i> | <i>NFE2L2</i> | <i>RB1</i>     | <i>TP53</i>   |
| <i>AKT3</i>  | <i>CALR</i>   | <i>CTNNB1</i> | <i>FGFR4</i> | <i>MAP2K2</i> | <i>NOTCH1</i> | <i>RET</i>     | <i>TPMT</i>   |
| <i>ALK</i>   | <i>CCND1</i>  | <i>CYP2D6</i> | <i>FLT3</i>  | <i>MAPK1</i>  | <i>NPM1</i>   | <i>RICTOR</i>  | <i>TSC1</i>   |
| <i>APC</i>   | <i>CCND2</i>  | <i>DDR2</i>   | <i>GNA11</i> | <i>MCL1</i>   | <i>NRAS</i>   | <i>RNF43</i>   | <i>TSC2</i>   |
| <i>AR</i>    | <i>CCND3</i>  | <i>DNMT3A</i> | <i>GNAQ</i>  | <i>MDM2</i>   | <i>NTRK1</i>  | <i>ROS1</i>    | <i>U2AF1</i>  |
| <i>ARAF</i>  | <i>CD274</i>  | <i>DPYD</i>   | <i>GNAS</i>  | <i>MET</i>    | <i>NTRK2</i>  | <i>RPTOR</i>   | <i>UGT1A1</i> |
| <i>ASXL1</i> | <i>CDH1</i>   | <i>EGFR</i>   | <i>H3F3A</i> | <i>MLH1</i>   | <i>NTRK3</i>  | <i>RUNX1</i>   | <i>VEGFA</i>  |
| <i>ATM</i>   | <i>CDK12</i>  | <i>EMSY</i>   | <i>HNF1A</i> | <i>MPL</i>    | <i>PALB2</i>  | <i>SF3B1</i>   | <i>VHL</i>    |
| <i>ATR</i>   | <i>CDK2</i>   | <i>ERBB2</i>  | <i>HRAS</i>  | <i>MRE11A</i> | <i>PARP1</i>  | <i>SLCO1B1</i> | <i>WT1</i>    |
| <i>ATRX</i>  | <i>CDK4</i>   | <i>ERBB3</i>  | <i>IDH1</i>  | <i>MSH2</i>   | <i>PARP2</i>  | <i>SMAD4</i>   |               |
| <i>AURKA</i> | <i>CDK5</i>   | <i>ERBB4</i>  | <i>IDH2</i>  | <i>MSH6</i>   | <i>PDGFRA</i> | <i>SMARCB1</i> |               |
| <i>AURKB</i> | <i>CDK6</i>   | <i>ERCC2</i>  | <i>IGF1R</i> | <i>MTOR</i>   | <i>PIK3CA</i> | <i>SMO</i>     |               |
| <i>AXL</i>   | <i>CDK8</i>   | <i>ESR1</i>   | <i>JAK2</i>  | <i>MUTYH</i>  | <i>PMS2</i>   | <i>SRC</i>     |               |
| <i>BCL2</i>  | <i>CDK9</i>   | <i>ETV6</i>   | <i>JAK3</i>  | <i>MYC</i>    | <i>PTCH1</i>  | <i>SRSF2</i>   |               |
| <i>BRAF</i>  | <i>CDKN2A</i> | <i>EZH2</i>   | <i>KDR</i>   | <i>MYD88</i>  | <i>PTEN</i>   | <i>STK11</i>   |               |

Supplementary Table 2. Sequencing metrics

| Cell line, tissue sample or DNA | Input DNA (ng) | No. of total reads | % of total reads mapped | % on target bases | Mean target coverage | Fold 80 penalty | % of ROI bases 0x | % of ROI bases >2x | % of ROI bases >20x | % of ROI bases >100x |
|---------------------------------|----------------|--------------------|-------------------------|-------------------|----------------------|-----------------|-------------------|--------------------|---------------------|----------------------|
| HD753                           | 100            | 110205802          | 94%                     | 55%               | 7310                 | 1.86            | 0%                | 99%                | 99%                 | 98%                  |
|                                 |                | 108749302          | 93%                     | 57%               | 7423                 | 1.83            | 0%                | 99%                | 99%                 | 98%                  |
|                                 |                | 88135012           | 94%                     | 57%               | 6089                 | 1.86            | 0%                | 99%                | 99%                 | 98%                  |
| NA12878 (CNV control)           | 100            | 75802056           | 94%                     | 57%               | 5267                 | 1.77            | 0%                | 99%                | 99%                 | 98%                  |
| HD753                           | 30             | 63178320           | 93%                     | 56%               | 4263                 | 1.91            | 0%                | 99%                | 98%                 | 97%                  |
|                                 |                | 58532866           | 92%                     | 54%               | 3797                 | 1.93            | 0%                | 99%                | 98%                 | 97%                  |
|                                 |                | 54430122           | 93%                     | 56%               | 3701                 | 1.94            | 1%                | 99%                | 98%                 | 97%                  |
| NA12878 (CNV control)           | 30             | 33507542           | 93%                     | 56%               | 2275                 | 2.04            | 1%                | 99%                | 98%                 | 96%                  |
| HD753                           | 10             | 55559294           | 92%                     | 53%               | 3575                 | 2.30            | 1%                | 98%                | 97%                 | 96%                  |
|                                 |                | 61116796           | 93%                     | 50%               | 3678                 | 2.32            | 0%                | 98%                | 97%                 | 95%                  |
|                                 |                | 79969534           | 93%                     | 51%               | 4882                 | 2.13            | 1%                | 99%                | 98%                 | 97%                  |
| NA12878 (CNV control)           | 10             | 40515504           | 93%                     | 53%               | 2571                 | 2.35            | 1%                | 98%                | 97%                 | 95%                  |
| PBMC 1                          | 100            | 35454871           | 92%                     | 51%               | 2315                 | 2.01            | 0%                | 99%                | 98%                 | 96%                  |
| PBMC 2                          |                | 60819476           | 93%                     | 53%               | 4110                 | 2.08            | 0%                | 99%                | 98%                 | 97%                  |
| PBMC 3                          |                | 83222324           | 93%                     | 53%               | 5668                 | 1.93            | 0%                | 99%                | 99%                 | 98%                  |
| PBMC 4                          |                | 48977047           | 93%                     | 54%               | 3344                 | 2.02            | 0%                | 99%                | 98%                 | 97%                  |
| FFPE 1                          | 100            | 20743673           | 94%                     | 61%               | 1545                 | 2.45            | 0%                | 98%                | 97%                 | 95%                  |
| FFPE 2                          |                | 56571084           | 94%                     | 59%               | 4056                 | 2.35            | 0%                | 99%                | 98%                 | 97%                  |
| FFPE 3                          |                | 48429980           | 94%                     | 60%               | 3555                 | 2.61            | 0%                | 99%                | 98%                 | 96%                  |
| FFPE 4                          |                | 46403043           | 94%                     | 62%               | 3434                 | 2.65            | 0%                | 99%                | 98%                 | 96%                  |
| cfDNA 1                         | 40             | 20795680           | 90%                     | 43%               | 978                  | 4.01            | 1%                | 96%                | 92%                 | 87%                  |
| cfDNA 2                         |                | 160425530          | 91%                     | 44%               | 7780                 | 2.19            | 1%                | 99%                | 98%                 | 97%                  |
| cfDNA 3                         |                | 72310096           | 91%                     | 44%               | 3615                 | 2.16            | 1%                | 99%                | 98%                 | 96%                  |
| cfDNA 4                         |                | 58667092           | 90%                     | 44%               | 2853                 | 2.48            | 1%                | 98%                | 97%                 | 95%                  |
| NA12878                         | 300            | 31367555           | 96%                     | 85%               | 3272                 | 1.78            | 0%                | 99%                | 99%                 | 98%                  |
|                                 |                | 29441285           | 96%                     | 85%               | 3063                 | 1.75            | 0%                | 99%                | 99%                 | 98%                  |
|                                 |                | 28539186           | 95%                     | 85%               | 2975                 | 1.76            | 0%                | 99%                | 99%                 | 98%                  |
|                                 |                | 29487621           | 95%                     | 85%               | 3080                 | 1.77            | 0%                | 99%                | 99%                 | 98%                  |
|                                 | 100            | 30501299           | 95%                     | 78%               | 2917                 | 1.96            | 0%                | 99%                | 98%                 | 97%                  |
|                                 |                | 33446725           | 94%                     | 79%               | 3205                 | 1.97            | 0%                | 99%                | 98%                 | 97%                  |
|                                 |                | 30097328           | 95%                     | 79%               | 2894                 | 1.98            | 0%                | 99%                | 98%                 | 97%                  |
|                                 |                | 32297098           | 94%                     | 79%               | 3097                 | 1.95            | 0%                | 99%                | 98%                 | 97%                  |
|                                 | 30             | 22911375           | 95%                     | 78%               | 2257                 | 2.23            | 1%                | 98%                | 97%                 | 95%                  |
|                                 |                | 24544655           | 95%                     | 79%               | 2453                 | 2.17            | 1%                | 98%                | 97%                 | 95%                  |
|                                 |                | 25614509           | 95%                     | 77%               | 2499                 | 2.15            | 0%                | 98%                | 97%                 | 95%                  |
|                                 |                | 21908500           | 95%                     | 78%               | 2160                 | 2.23            | 0%                | 98%                | 97%                 | 95%                  |
|                                 | 10             | 32151176           | 94%                     | 67%               | 2710                 | 3.49            | 1%                | 97%                | 94%                 | 91%                  |
|                                 |                | 35590530           | 88%                     | 70%               | 3149                 | 3.15            | 1%                | 98%                | 96%                 | 94%                  |
|                                 |                | 31205593           | 94%                     | 63%               | 2497                 | 3.89            | 1%                | 97%                | 94%                 | 91%                  |
|                                 |                | 30386942           | 94%                     | 68%               | 2585                 | 3.76            | 1%                | 97%                | 95%                 | 92%                  |
| HD200                           | 300            | 32373402           | 95%                     | 74%               | 3042                 | 1.92            | 0%                | 99%                | 98%                 | 97%                  |
|                                 |                | 40156181           | 95%                     | 73%               | 3701                 | 2.02            | 0%                | 99%                | 98%                 | 97%                  |
|                                 |                | 56043828           | 95%                     | 72%               | 5082                 | 1.91            | 0%                | 99%                | 98%                 | 97%                  |
|                                 |                | 66106561           | 95%                     | 71%               | 5939                 | 1.96            | 0%                | 99%                | 98%                 | 97%                  |
|                                 | 100            | 70389501           | 93%                     | 66%               | 5818                 | 2.14            | 0%                | 99%                | 98%                 | 97%                  |
|                                 |                | 57300213           | 94%                     | 66%               | 4768                 | 2.14            | 0%                | 99%                | 98%                 | 97%                  |
|                                 |                | 52017269           | 95%                     | 65%               | 4196                 | 1.96            | 0%                | 99%                | 98%                 | 97%                  |
|                                 |                | 40061295           | 94%                     | 65%               | 3254                 | 1.97            | 0%                | 99%                | 98%                 | 96%                  |
|                                 | 30             | 30013711           | 94%                     | 62%               | 2304                 | 2.33            | 1%                | 98%                | 97%                 | 94%                  |
|                                 |                | 35324044           | 95%                     | 62%               | 2739                 | 2.31            | 1%                | 98%                | 97%                 | 95%                  |
|                                 |                | 46140323           | 95%                     | 61%               | 3478                 | 2.32            | 0%                | 98%                | 97%                 | 95%                  |
|                                 |                | 33036732           | 95%                     | 62%               | 2545                 | 2.21            | 0%                | 98%                | 97%                 | 95%                  |
|                                 | 10             | 24773897           | 95%                     | 62%               | 1905                 | 2.55            | 1%                | 97%                | 95%                 | 93%                  |
|                                 |                | 24356873           | 95%                     | 62%               | 1886                 | 2.54            | 1%                | 97%                | 96%                 | 93%                  |
|                                 |                | 21575961           | 95%                     | 61%               | 1635                 | 2.72            | 1%                | 97%                | 95%                 | 92%                  |
|                                 |                | 19210875           | 95%                     | 61%               | 1459                 | 2.75            | 1%                | 97%                | 95%                 | 92%                  |
| STMM-Mix-II, 25% VAF            | 100            | 49094806           | 89%                     | 57%               | 1698                 | 3.07            | 0%                | 99%                | 97%                 | 93%                  |
| STMM-Mix-II, 15% VAF            |                | 50576606           | 89%                     | 56%               | 1739                 | 3.09            | 0%                | 99%                | 97%                 | 93%                  |
| STMM-Mix-II, 10% VAF            |                | 57019613           | 89%                     | 57%               | 1966                 | 2.95            | 0%                | 99%                | 97%                 | 94%                  |
| STMM-Mix-II, 5% VAF             |                | 52400018           | 88%                     | 56%               | 1805                 | 3.02            | 0%                | 99%                | 97%                 | 93%                  |
| FFPE 5, TOMA repair             |                | 21019706           | 90%                     | 84%               | 1966                 | 2.55            | 2%                | 98%                | 97%                 | 93%                  |
| FFPE 5, No repair               |                | 8150810            | 52%                     | 48%               | 439                  | 2.99            | 3%                | 96%                | 94%                 | 84%                  |
| FFPE 5, NEB repair              |                | 17768438           | 91%                     | 83%               | 1633                 | 2.67            | 2%                | 98%                | 97%                 | 92%                  |
| FFPE 6, TOMA repair             |                | 20034896           | 89%                     | 83%               | 1808                 | 2.95            | 2%                | 98%                | 96%                 | 92%                  |
| FFPE 6, No repair               |                | 7210412            | 90%                     | 85%               | 674                  | 5.28            | 4%                | 96%                | 93%                 | 82%                  |
| FFPE 6, NEB repair              |                | 36982426           | 86%                     | 79%               | 3084                 | 2.98            | 2%                | 98%                | 97%                 | 94%                  |
| FFPE 7, TOMA repair             |                | 37195202           | 89%                     | 82%               | 3446                 | 2.69            | 2%                | 98%                | 97%                 | 94%                  |
| FFPE 7, No repair               |                | 12665816           | 92%                     | 85%               | 1255                 | 3.02            | 2%                | 97%                | 96%                 | 91%                  |
| FFPE 7, TOMA repair             |                | 23536628           | 89%                     | 81%               | 2150                 | 2.99            | 2%                | 98%                | 97%                 | 92%                  |
| FFPE 2 rerun, TOMA repair       |                | 9105974            | 90%                     | 88%               | 1037                 | 3.89            | 3%                | 96%                | 94%                 | 86%                  |
| FFPE 2 rerun, No repair         |                | 9153164            | 92%                     | 89%               | 1068                 | 4.87            | 4%                | 96%                | 93%                 | 85%                  |
| FFPE 2 rerun, NEB repair        |                | 22069784           | 92%                     | 87%               | 2543                 | 3.95            | 3%                | 97%                | 95%                 | 90%                  |

**Supplementary Table 3. Variants for STMM-Mix-II (coordinates given for GRC37)**

| Chr | Position  | Reference base | Alternative base | Gene          | Amino acid substitution        |
|-----|-----------|----------------|------------------|---------------|--------------------------------|
| 1   | 43815009  | G              | T                | <i>MPL</i>    | p.Trp515Leu                    |
| 1   | 115256529 | T              | C                | <i>NRAS</i>   | p.Gln61Arg                     |
| 2   | 209113113 | G              | A                | <i>IDH1</i>   | p.Arg132Cys                    |
| 3   | 41266124  | A              | G                | <i>CTNNB1</i> | p.Thr41Ala                     |
| 3   | 178936091 | G              | A                | <i>PIK3CA</i> | p.Glu545Lys                    |
| 3   | 178952085 | A              | G                | <i>PIK3CA</i> | p.His1047Arg                   |
| 3   | 178952149 | C              | CA               | <i>PIK3CA</i> | p.Ter1069MetfsTer4             |
| 4   | 1803568   | C              | G                | <i>FGFR3</i>  | p.Ser249Cys                    |
| 4   | 55141049  | CAGCCCA        | CAGCCCG,A        | <i>PDGFRA</i> | p.Ser566GlnfsTer6              |
| 4   | 55152093  | A              | T                | <i>PDGFRA</i> | p.Asp842Val                    |
| 4   | 55599321  | A              | T                | <i>KIT</i>    | p.Asp816Val                    |
| 5   | 112175639 | C              | T                | <i>APC</i>    | p.Arg1450Ter                   |
| 5   | 112175957 | A              | AA               | <i>APC</i>    | p.Thr1556AsnfsTer3             |
| 5   | 170837543 | C              | CTCTG            | <i>NPM1</i>   | p.Trp288CysfsTer12             |
| 7   | 55242465  | GGAATTAAG..    | G                | <i>EGFR</i>   | p.Glu693_Ala697delinsdel       |
| 7   | 55249012  | C              | CGGT             | <i>EGFR</i>   | p.Asp717_Asn718insGly          |
| 7   | 55249071  | C              | T                | <i>EGFR</i>   | p.Thr737Met                    |
| 7   | 55259515  | T              | G                | <i>EGFR</i>   | p.Leu813Arg                    |
| 7   | 140453136 | A              | T                | <i>BRAF</i>   | p.Val208Glu                    |
| 9   | 5073770   | G              | T                | <i>JAK2</i>   | p.Val617Phe                    |
| 9   | 80409488  | T              | G                | <i>GNAQ</i>   | p.Gln7Pro                      |
| 10  | 43617416  | T              | C                | <i>RET</i>    | p.Met918Thr                    |
| 10  | 89717716  | A              | AA               | <i>PTEN</i>   | p.Pro248ThrfsTer5              |
| 10  | 89717774  | AA             | A                | <i>PTEN</i>   | p.Lys267ArgfsTer9              |
| 11  | 108117846 | TGT            | T                | <i>ATM</i>    | p.Cys353SerfsTer5              |
| 12  | 25398284  | C              | T                | <i>KRAS</i>   | p.Gly12Asp                     |
| 13  | 28592642  | C              | A                | <i>FLT3</i>   | p.Asp835Tyr                    |
| 14  | 105246551 | C              | T                | <i>AKT1</i>   | p.Glu17Lys                     |
| 17  | 7577120   | C              | T                | <i>TP53</i>   | p.Arg273His                    |
| 17  | 7577538   | C              | T                | <i>TP53</i>   | p.Arg116Gln                    |
| 17  | 7577557   | AG             | A                | <i>TP53</i>   | p.Cys242AlafsTer5              |
| 17  | 7578406   | C              | T                | <i>TP53</i>   | p.Arg175His                    |
| 17  | 7579423   | GG             | G                | <i>TP53</i>   | p.Ser90ProfsTer33              |
| 17  | 37880981  | A              | AGCATACGT        | <i>ERBB2</i>  | p.Glu755_Ala756insAlaTyrValMet |
| 18  | 48603092  | G              | GT               | <i>SMAD4</i>  | p.Ala55GlyfsTer19              |
| 19  | 3118942   | A              | T                | <i>GNA11</i>  | p.Gln58Leu                     |
| 20  | 57484420  | C              | T                | <i>GNAS</i>   | p.Arg201Cys                    |

Supplementary Table 4. Detection of variants from a control DNA mixture (HD200).

| Variant                    | Base change (genomic)                           | % VAF spiked in | 300 ng       |             |            |           | 100 ng      |             |            |            | 30 ng       |             |            |            | 10 ng       |             |            |            |
|----------------------------|-------------------------------------------------|-----------------|--------------|-------------|------------|-----------|-------------|-------------|------------|------------|-------------|-------------|------------|------------|-------------|-------------|------------|------------|
|                            |                                                 |                 | coverage     |             | VAF        |           | coverage    |             | VAF        |            | coverage    |             | VAF        |            | coverage    |             | VAF        |            |
|                            |                                                 |                 | mean         | SD          | mean       | SD        | mean        | SD          | mean       | SD         | mean        | SD          | mean       | SD         | mean        | SD          | mean       | SD         |
| <b>BRAF (V600E)</b>        | <b>g.chr7:140453136A&gt;T</b>                   | <b>10.5</b>     | <b>10108</b> | <b>4415</b> | <b>11%</b> | <b>2%</b> | <b>8309</b> | <b>1632</b> | <b>11%</b> | <b>4%</b>  | <b>6275</b> | <b>2755</b> | <b>8%</b>  | <b>3%</b>  | <b>2580</b> | <b>545</b>  | <b>6%</b>  | <b>4%</b>  |
| <i>KIT</i> (D816V)         | g.chr4:55599321A>T                              | 10              | 4559         | 1967        | 9%         | 2%        | 4123        | 1209        | 12%        | 3%         | 3068        | 733         | 8%         | 7%         | 1346        | 329         | 7%         | 10%        |
| <b>EGFR (ΔE746 - A750)</b> | <b>g.chr7:55242465_55242479delGGAATTAAGAGAA</b> | <b>2</b>        | <b>3833</b>  | <b>1303</b> | <b>1%</b>  | <b>0%</b> | <b>4487</b> | <b>1022</b> | <b>1%</b>  | <b>1%</b>  | <b>2760</b> | <b>735</b>  | <b>1%</b>  | <b>0%</b>  | <b>ND</b>   | <b>ND</b>   | <b>ND</b>  | <b>ND</b>  |
| <i>EGFR</i> (L858R)        | g.chr7:55259515T>G                              | 3               | 9356         | 2546        | 2%         | 0%        | 8876        | 2505        | 2%         | 2%         | 4894        | 1050        | 6%         | 6%         | 3565        | 1009        | 2%         | 2%         |
| <b>EGFR (T790M)</b>        | <b>g.chr7:55249071C&gt;T</b>                    | <b>1</b>        | <b>5203</b>  | <b>1991</b> | <b>1%</b>  | <b>1%</b> | <b>4941</b> | <b>565</b>  | <b>1%</b>  | <b>1%</b>  | <b>2360</b> | <b>857</b>  | <b>2%</b>  | <b>3%</b>  | <b>1764</b> | <b>267</b>  | <b>2%</b>  | <b>3%</b>  |
| <i>EGFR</i> (G719S)        | g.chr7:55241707G>A                              | 24.5            | 5682         | 1298        | 22%        | 4%        | 5722        | 1042        | 16%        | 2%         | 3051        | 775         | 25%        | 13%        | 1934        | 946         | 50%        | 12%        |
| <b>KRAS (G13D)</b>         | <b>g.chr12:25398281C&gt;T</b>                   | <b>15</b>       | <b>4725</b>  | <b>2300</b> | <b>12%</b> | <b>2%</b> | <b>6445</b> | <b>4321</b> | <b>10%</b> | <b>8%</b>  | <b>3708</b> | <b>2216</b> | <b>9%</b>  | <b>3%</b>  | <b>2027</b> | <b>1197</b> | <b>16%</b> | <b>15%</b> |
| <i>KRAS</i> (G12D)         | g.chr12:25398285C>T                             | 6               | 4814         | 2303        | 5%         | 2%        | 6652        | 4390        | 4%         | 3%         | 3758        | 2226        | 3%         | 2%         | 2105        | 1203        | 4%         | 7%         |
| <b>NRAS (Q61K)</b>         | <b>g.chr1:115256530G&gt;T</b>                   | <b>12.5</b>     | <b>2940</b>  | <b>795</b>  | <b>11%</b> | <b>3%</b> | <b>2693</b> | <b>622</b>  | <b>11%</b> | <b>4%</b>  | <b>1938</b> | <b>1005</b> | <b>11%</b> | <b>6%</b>  | <b>1629</b> | <b>966</b>  | <b>30%</b> | <b>25%</b> |
| <i>PIK3CA</i> (H1047R)     | g.chr3:178952085A>G                             | 17.5            | 4512         | 1329        | 17%        | 5%        | 6115        | 2760        | 14%        | 4%         | 3262        | 1075        | 14%        | 7%         | 2556        | 903         | 18%        | 1%         |
| <b>PIK3CA (E545K)</b>      | <b>g.chr3:178936082G&gt;A</b>                   | <b>9.5</b>      | <b>4117</b>  | <b>1003</b> | <b>9%</b>  | <b>4%</b> | <b>5769</b> | <b>3297</b> | <b>7%</b>  | <b>4%</b>  | <b>2777</b> | <b>352</b>  | <b>2%</b>  | <b>2%</b>  | <b>ND</b>   | <b>ND</b>   | <b>ND</b>  | <b>ND</b>  |
| <i>ALK</i> (P1543S)        | g.chr2:29416326G>A                              | 33              | 2840         | 832         | 17%        | 2%        | 2931        | 912         | 15%        | 12%        | 836         | 261         | 16%        | 13%        | 820         | 361         | 44%        | 39%        |
| <b>ABL2 (P986fs)</b>       | <b>g.chr1:179077445_179077445delG</b>           | <b>8</b>        | <b>3171</b>  | <b>917</b>  | <b>7%</b>  | <b>7%</b> | <b>3408</b> | <b>910</b>  | <b>3%</b>  | <b>3%</b>  | <b>2809</b> | <b>1932</b> | <b>6%</b>  | <b>2%</b>  | <b>2042</b> | <b>512</b>  | <b>6%</b>  | <b>2%</b>  |
| <i>APC</i> (R2714C)        | g.chr5:112179431C>T                             | 33              | 6311         | 3214        | 16%        | 8%        | 4906        | 2207        | 16%        | 7%         | 2713        | 765         | 20%        | 9%         | 1790        | 674         | 22%        | 23%        |
| <b>BRCA2 (A1689fs)</b>     | <b>g.chr13:32913559_32913559delA</b>            | <b>33</b>       | <b>5510</b>  | <b>2563</b> | <b>21%</b> | <b>7%</b> | <b>5270</b> | <b>1199</b> | <b>22%</b> | <b>6%</b>  | <b>2496</b> | <b>777</b>  | <b>21%</b> | <b>6%</b>  | <b>1442</b> | <b>633</b>  | <b>28%</b> | <b>23%</b> |
| <i>FGFR1</i> (P150L)       | g.chr8:38285611G>A                              | 8.5             | 4424         | 2341        | 5%         | 2%        | 3176        | 940         | 10%        | 6%         | 1730        | 825         | 11%        | 4%         | 1582        | 111         | 11%        | 16%        |
| <b>FLT3 (S985fs)</b>       | <b>g.chr13:28578215_28578216delGA</b>           | <b>10.5</b>     | <b>3703</b>  | <b>984</b>  | <b>9%</b>  | <b>3%</b> | <b>4565</b> | <b>771</b>  | <b>8%</b>  | <b>3%</b>  | <b>2757</b> | <b>757</b>  | <b>9%</b>  | <b>6%</b>  | <b>2198</b> | <b>1316</b> | <b>17%</b> | <b>5%</b>  |
| <i>FLT3</i> (V197A)        | g.chr13:28626706A>G                             | 11.5            | 3590         | 957         | 8%         | 3%        | 5006        | 1387        | 7%         | 3%         | 2425        | 667         | 1%         | 2%         | 2124        | 982         | 23%        | 14%        |
| <b>IDH1 (S261L)</b>        | <b>g.chr2:209106786G&gt;A</b>                   | <b>10</b>       | <b>4823</b>  | <b>1182</b> | <b>9%</b>  | <b>2%</b> | <b>4630</b> | <b>584</b>  | <b>9%</b>  | <b>2%</b>  | <b>3125</b> | <b>361</b>  | <b>10%</b> | <b>7%</b>  | <b>1788</b> | <b>547</b>  | <b>4%</b>  | <b>5%</b>  |
| <i>MET</i> (V237fs)        | g.chr7:116339848_116339848delT                  | 6.5             | 7788         | 2678        | 5%         | 1%        | 7626        | 2321        | 2%         | 1%         | 4246        | 625         | 6%         | 3%         | 2585        | 750         | 7%         | 9%         |
| <b>MLH1 (L323M)</b>        | <b>g.chr3:37061883C&gt;A</b>                    | <b>8.5</b>      | <b>6443</b>  | <b>1888</b> | <b>8%</b>  | <b>3%</b> | <b>7516</b> | <b>4199</b> | <b>6%</b>  | <b>4%</b>  | <b>3807</b> | <b>1458</b> | <b>10%</b> | <b>8%</b>  | <b>2753</b> | <b>1029</b> | <b>9%</b>  | <b>5%</b>  |
| <i>NF1</i> (L626fs)        | g.chr17:29552144_29552144delT                   | 7.5             | 3036         | 971         | 8%         | 2%        | 3023        | 934         | 8%         | 6%         | 3046        | 913         | 4%         | 3%         | 1013        | 702         | 39%        | 41%        |
| <b>NOTCH1 (P668S)</b>      | <b>g.chr9:139409754G&gt;A</b>                   | <b>31.5</b>     | <b>2413</b>  | <b>1024</b> | <b>25%</b> | <b>8%</b> | <b>2946</b> | <b>985</b>  | <b>22%</b> | <b>10%</b> | <b>1145</b> | <b>351</b>  | <b>30%</b> | <b>13%</b> | <b>1400</b> | <b>551</b>  | <b>27%</b> | <b>9%</b>  |
| <i>PDGFRA</i> (G426D)      | g.chr4:55138600G>A                              | 33.5            | 9958         | 3572        | 25%        | 1%        | 10656       | 1335        | 24%        | 3%         | 7898        | 1515        | 20%        | 2%         | 4737        | 957         | 26%        | 11%        |

In orange: Variant observed in 3 out of 4 replicates

In red: Variant observed in 2 out of 4 replicates

ND: Not detected, or detected in 1 out 4 replicates only

Supplementary Table 5. Detection of variants from a control DNA mixture (HD753).

| Mutation                      | Base change (genomic)                      | % VAF spiked in | 100 ng   |      |        |       | 30 ng    |      |        |        | 10 ng    |      |        |        |
|-------------------------------|--------------------------------------------|-----------------|----------|------|--------|-------|----------|------|--------|--------|----------|------|--------|--------|
|                               |                                            |                 | coverage |      | VAF    |       | coverage |      | VAF    |        | coverage |      | VAF    |        |
|                               |                                            |                 | mean     | SD   | mean   | SD    | mean     | SD   | mean   | SD     | mean     | SD   | mean   | SD     |
| <i>GNA11</i> (Q209L)          | g.chr19:3118942A>T                         | 5.60            | 11070    | 1107 | 4.80%  | 2.00% | 4979     | 1288 | 6.80%  | 2.10%  | 6087     | 4630 | 9.60%  | 11.30% |
| <i>AKT</i> (E17K)             | g.chr14:105246551A>T                       | 5.00            | 3097     | 618  | 11.20% | 6.60% | 1025     | 430  | 1.20%  | 1.50%  | 1882     | 416  | 41.60% | 53.40% |
| <i>PIK3CA</i> (E545K)         | g.chr3:178936082G>A                        | 5.60            | 7920     | 1535 | 7.10%  | 0.80% | 3514     | 1178 | 11.70% | 6.40%  | 4446     | 1830 | 2.60%  | 4.40%  |
| <i>PIK3CA</i> (H1047R)        | g.chr3:178952085A>G                        | 16.70           | 8285     | 1173 | 18.80% | 3.00% | 5322     | 1641 | 17.50% | 0.90%  | 4861     | 636  | 14.70% | 12.60% |
| <i>EGFR</i> (V769_D770insASV) | g.chr7:55249009insGCCAGCGTG                | 5.60            | 4266     | 95   | 0.30%  | 0.30% | 3583     | 240  | 0.20%  | 0.00%  | ND       | ND   | ND     | ND     |
| <i>EGFR</i> (ΔE746 - A750)    | g.chr7:55242465_55242479delGGAATTAAGAGAAGC | 5.30            | 3951     | 505  | 3.40%  | 4.80% | ND       | ND   | ND     | ND     | 1375     | 1056 | 2.00%  | 2.80%  |
| <i>EGFR</i> (G719S)           | g.chr7:55241707G>A                         | 5.30            | 9546     | 1819 | 5.30%  | 1.30% | 5465     | 1637 | 14.90% | 13.40% | 3710     | 1064 | 11.00% | 9.70%  |
| <i>KRAS</i> (G13D)            | g.chr12:25398281C>T                        | 5.60            | 10889    | 2829 | 1.50%  | 1.10% | 5831     | 1081 | 5.50%  | 5.70%  | 4990     | 1303 | 1.90%  | 2.80%  |
| <i>NOTCH1</i> (P668S)         | g.chr9:139409754G>A                        | 5.00            | 3298     | 949  | 9.30%  | 3.30% | 3313     | 176  | 4.00%  | 3.90%  | 1099     | 573  | 0.60%  | 0.10%  |
| <i>MET</i> (V237fs)           | g.chr7:116339848_116339848delT             | 2.50            | 16442    | 2773 | 2.00%  | 1.10% | 8991     | 655  | 1.30%  | 1.10%  | 8190     | 3022 | 4.80%  | 6.90%  |
| <i>FLT3</i> (S985fs)          | g.chr13:28578215_28578216delGA             | 5.60            | 10640    | 7179 | 4.70%  | 7.60% | 3664     | 444  | 4.60%  | 6.50%  | 2877     | 363  | 6.80%  | 3.00%  |
| <i>BRCA2</i> (A1689fs)        | g.chr13:32913559_32913559delA              | 5.60            | 5911     | 936  | 5.40%  | 1.60% | 4065     | 1039 | 11.30% | 10.80% | 3491     | 829  | 8.10%  | 6.10%  |
| <i>BRAF</i> (V600E)           | g.chr7:140453136A>T                        | 18.20           | 13928    | 2086 | 17.40% | 3.70% | 7124     | 1016 | 16.30% | 6.20%  | 8153     | 3541 | 22.30% | 18.60% |

In red: Variant observed in 2 out of 3 replicates

ND: Not detected, or detected in 1 out 3 replicates only

SD: standard deviation

**Supplementary Table 6. Characteristics of clinical tissue source**

| <b>Patient number</b> | 1          | 2                   | 3                   | 4                   |
|-----------------------|------------|---------------------|---------------------|---------------------|
| <b>Tumor type</b>     | colorectal | non-small cell lung | non-small cell lung | non-small cell lung |
| <b>Patient gender</b> | male       | male                | male                | male                |
| <b>Disease stage</b>  | III B      | III B               | III A               | III A               |

**Supplementary Table 7. Reported variants from analysis of clinical tissue samples**

| <b>Patient</b> | <b>Sample</b> | <b>Number of SNVs</b> | <b>Number of SNVs listed in ExaC</b> | <b>Percentage of SNVs listed in ExaC</b> | <b>Number of SNVs listed in 1000 GP</b> | <b>Percentage of SNVs listed in 1000 GP</b> |
|----------------|---------------|-----------------------|--------------------------------------|------------------------------------------|-----------------------------------------|---------------------------------------------|
| 1              | PBMC          | 203                   | 196                                  | 97%                                      | 189                                     | 93%                                         |
|                | FFPE          | 208                   | 188                                  | 90%                                      | 176                                     | 85%                                         |
|                | cfDNA         | 136                   | 109                                  | 80%                                      | 105                                     | 77%                                         |
| 2              | PBMC          | 186                   | 180                                  | 97%                                      | 173                                     | 93%                                         |
|                | FFPE          | 184                   | 175                                  | 95%                                      | 169                                     | 92%                                         |
|                | cfDNA         | 158                   | 147                                  | 93%                                      | 146                                     | 92%                                         |
| 3              | PBMC          | 195                   | 186                                  | 95%                                      | 180                                     | 92%                                         |
|                | FFPE          | 203                   | 186                                  | 92%                                      | 175                                     | 86%                                         |
|                | cfDNA         | 163                   | 149                                  | 91%                                      | 143                                     | 88%                                         |
| 4              | PBMC          | 198                   | 193                                  | 97%                                      | 183                                     | 92%                                         |
|                | FFPE          | 201                   | 193                                  | 96%                                      | 179                                     | 89%                                         |
|                | cfDNA         | 178                   | 160                                  | 90%                                      | 147                                     | 83%                                         |

Supplementary Table 8. Somatic mutations from clinical tumor samples.

| Sample        | Gene          | Chromosome | Position  | Wildtype base | Mutation base | Mutation type   | Wildtype amino acid | Substitution amino acid | CADD score | Tumors in COSMIC | COSMIC mutation ID |
|---------------|---------------|------------|-----------|---------------|---------------|-----------------|---------------------|-------------------------|------------|------------------|--------------------|
| 1             | <i>FGFR3</i>  | 4          | 1807192   | A             | T             | missense        | LYS                 | MET                     | 27         | 0                |                    |
|               | <i>APC</i>    | 5          | 112164616 | C             | T             | stop_gained     | ARG                 | TER                     | 39         | 35               | COSM18848          |
|               | <i>EGFR</i>   | 7          | 55229272  | C             | T             | missense        | ARG                 | TRP                     | 24.4       | 0                |                    |
|               | <i>NOTCH1</i> | 9          | 139399282 | C             | T             | missense        | GLY                 | SER                     | 29.5       | 0                |                    |
|               | <i>NOTCH1</i> | 9          | 139401880 | C             | T             | missense        | GLY                 | SER                     | 35         | 0                |                    |
|               | <i>NOTCH1</i> | 9          | 139402504 | G             | T             | missense        | THR                 | LYS                     | 24.4       | 0                |                    |
|               | <i>NOTCH1</i> | 9          | 139412721 | C             | T             | missense        | ALA                 | THR                     | 26.7       | 0                |                    |
|               | <i>RET</i>    | 10         | 43600457  | C             | T             | missense        | ALA                 | VAL                     | 23.2       | 0                |                    |
|               | <i>HNF1A</i>  | 12         | 121416876 | C             | T             | missense        | ALA                 | VAL                     | 24.5       | 0                |                    |
|               | <i>AKT1</i>   | 14         | 105240286 | C             | T             | missense        | ARG                 | HIS                     | 24.4       | 0                |                    |
|               | <i>TSC2</i>   | 16         | 2103430   | C             | A             | missense        | LEU                 | MET                     | 26.4       | 0                |                    |
|               | <i>TSC2</i>   | 16         | 2124201   | C             | T             | missense,splice | ARG                 | CYS                     | 27.6       | 0                |                    |
|               | <i>NF1</i>    | 17         | 29585422  | A             | G             | missense        | ARG                 | GLY                     | 25.8       | 0                |                    |
|               | <i>ERBB2</i>  | 17         | 37879573  | C             | T             | missense,splice | PRO                 | SER                     | 20.8       | 0                |                    |
|               | <i>RPTOR</i>  | 17         | 78897382  | C             | T             | missense        | PRO                 | LEU                     | 28.3       | 0                |                    |
|               | <i>STK11</i>  | 19         | 1220701   | C             | T             | missense        | SER                 | LEU                     | 35         | 0                |                    |
|               | <i>MAP2K2</i> | 19         | 4101030   | C             | T             | missense        | ARG                 | HIS                     | 29.7       | 0                |                    |
|               | <i>U2AF1</i>  | 21         | 44513336  | C             | T             | missense        | ARG                 | GLN                     | 24.2       | 0                |                    |
| <i>CYP2D6</i> | 22            | 42526694   | G         | A             | missense      | PRO             | SER                 | 24.9                    | 8          | COSM4999522      |                    |
| 2             | <i>CDKN2A</i> | 9          | 21971159  | C             | T             | missense        | GLY                 | SER                     | 33         | 2                | COSM12746          |
|               | <i>CDKN2B</i> | 9          | 22006235  | C             | A             | missense        | MET                 | ILE                     | 32         | 0                |                    |
|               | <i>CCND1</i>  | 11         | 69466039  | G             | A             | missense        | VAL                 | MET                     | 32         | 0                |                    |
|               | <i>AKT1</i>   | 14         | 105246424 | C             | T             | splice_donor    | na                  | na                      | 22.9       | 0                |                    |
|               | <i>AR</i>     | 23         | 66765085  | G             | A             | missense        | VAL                 | MET                     | 27         | 0                |                    |
| 3             | <i>FGFR3</i>  | 4          | 1808964   | C             | T             | missense        | PRO                 | LEU                     | 23.2       | 0                |                    |
|               | <i>HRAS</i>   | 11         | 532668    | C             | T             | missense        | GLY                 | SER                     | 22.2       | 0                |                    |
|               | <i>RPTOR</i>  | 17         | 78796081  | C             | T             | missense        | ALA                 | VAL                     | 34         | 1                | COSM4070538        |
|               | <i>RUNX1</i>  | 21         | 36259397  | C             | T             | splice,intron   | na                  | na                      | 22.3       | 0                |                    |
| 4             | <i>FGFR3</i>  | 4          | 1803410   | A             | G             | missense        | THR                 | ALA                     | 24.4       | 0                |                    |
|               | <i>ABL1</i>   | 9          | 133759889 | C             | T             | missense        | ARG                 | TRP                     | 34         | 0                |                    |
|               | <i>RUNX1</i>  | 21         | 36164595  | C             | T             | missense        | ARG                 | HIS                     | 34         | 1                | COSM4854845        |
|               | <i>RUNX1</i>  | 21         | 36259241  | C             | A             | missense        | ASP                 | TYR                     | 34         | 0                |                    |



**Supplementary Table 9. C>T transition rate in FFPE samples treated with different repair steps**

| <b>Patient</b> | <b>Repair</b> | <b>total number of variants</b> | <b>C&gt;T/G&gt;A</b> | <b>Percentage</b> |
|----------------|---------------|---------------------------------|----------------------|-------------------|
| 2              | TOMA repair   | 698                             | 257                  | 37%               |
|                | NO repair     | 855                             | 438                  | 51%               |
|                | NEB repair    | 674                             | 249                  | 37%               |
| 5              | TOMA repair   | 1258                            | 723                  | 57%               |
|                | NO repair     | 1750                            | 1241                 | 71%               |
|                | NEB repair    | 1457                            | 839                  | 58%               |
| 6              | TOMA repair   | 1139                            | 613                  | 54%               |
|                | NO repair     | 1575                            | 1048                 | 67%               |
|                | NEB repair    | 1024                            | 525                  | 51%               |
| 7              | TOMA repair   | 1027                            | 523                  | 51%               |
|                | NO repair     | 1892                            | 1341                 | 71%               |
|                | NEB repair    | 1112                            | 593                  | 53%               |
